# Supplementary material
Source: PubMed Central journal article supplement (PMC2867904)

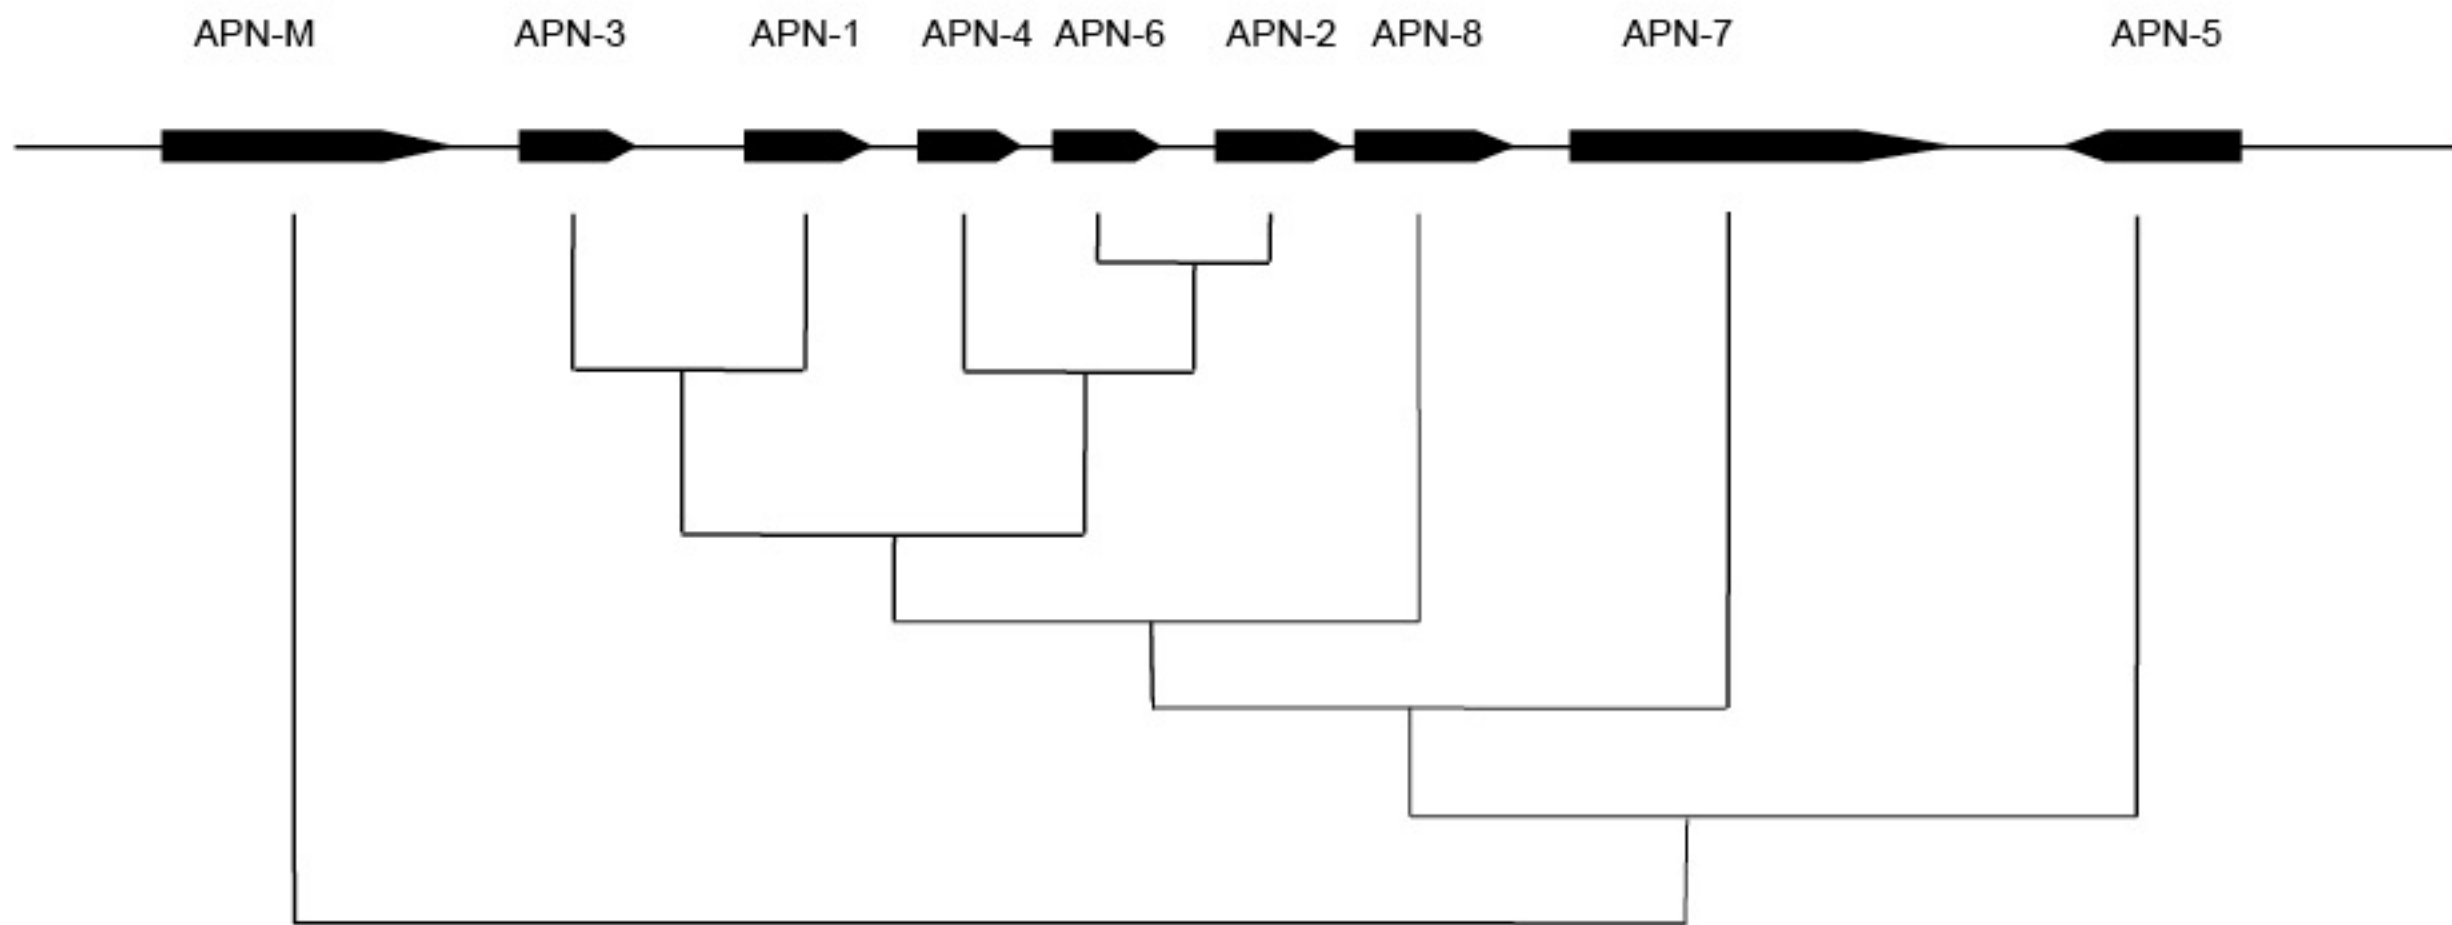

Supplement: 0910413107_sfig03.pdf [file 0910413107_sfig03.pdf]

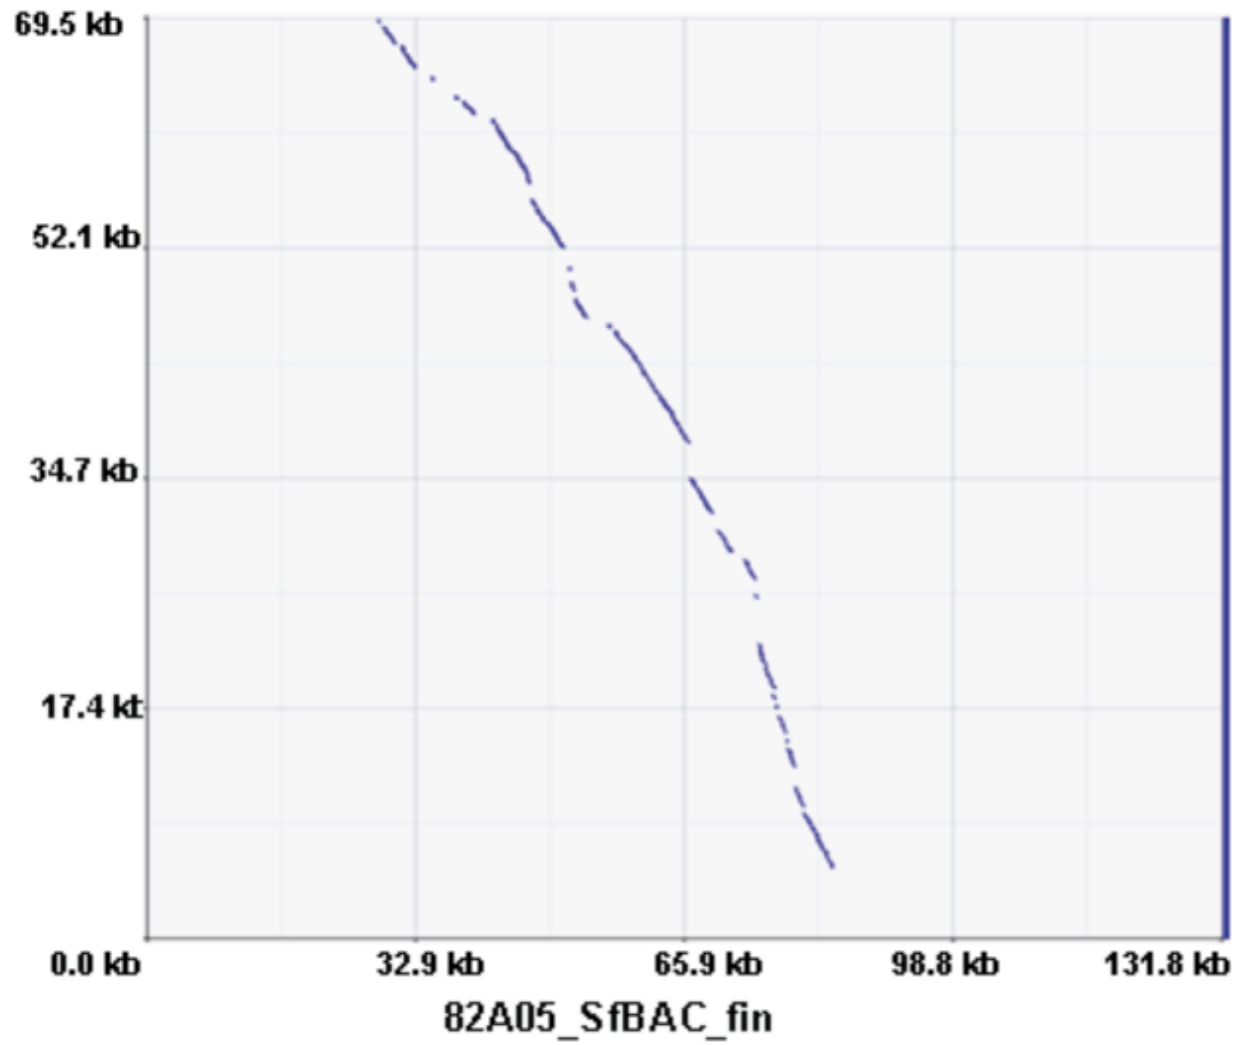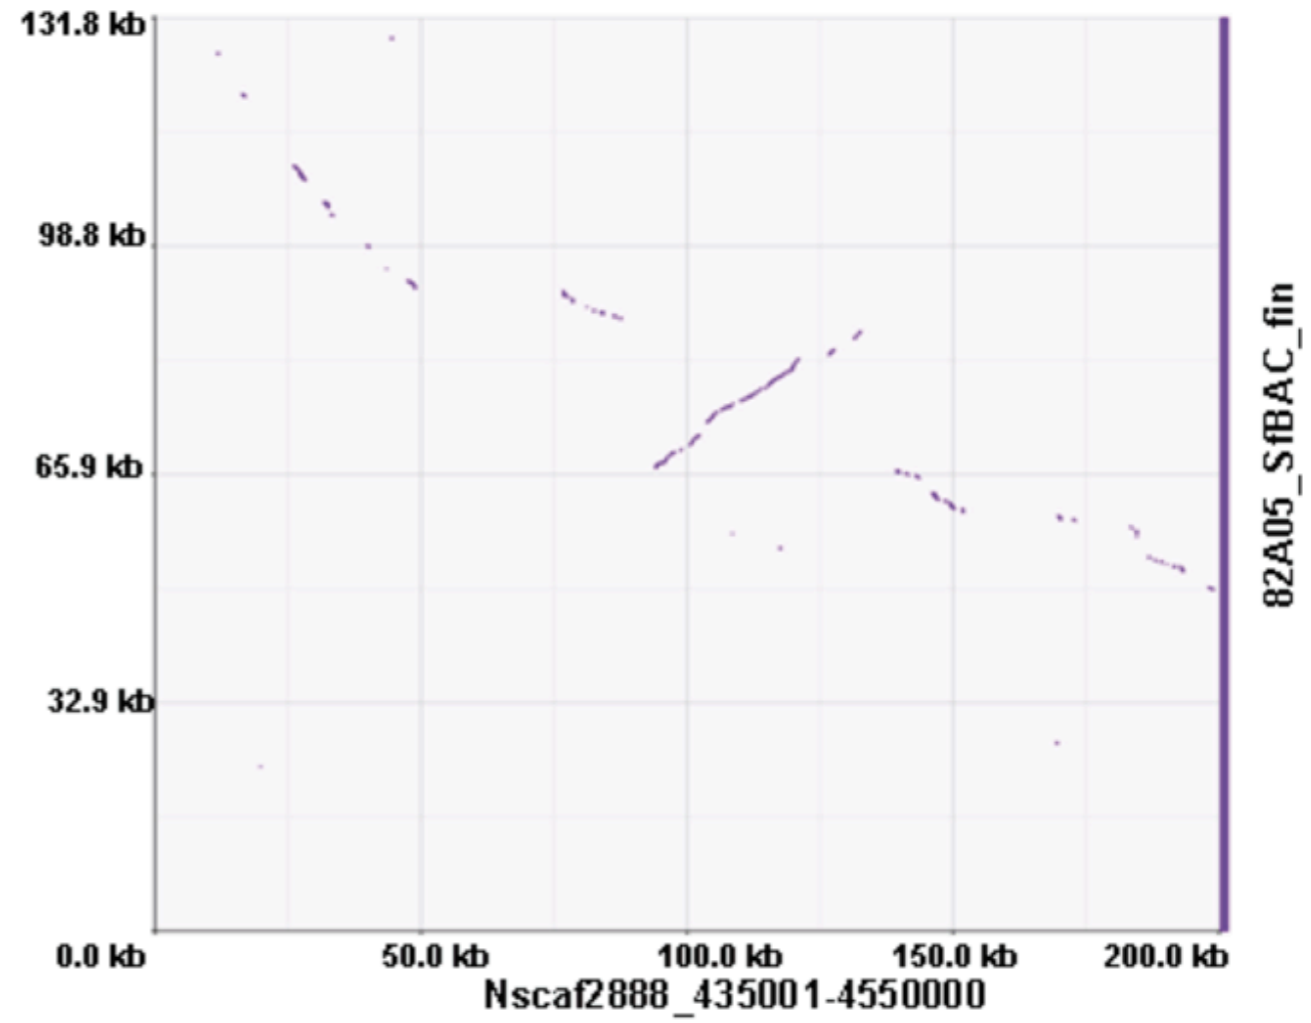

Supplement: 0910413107_sfig04.pdf [file 0910413107_sfig04.pdf]
